# Supplementary material
Source: publisher figshare collection journal article supplement (https://sage.figshare.com/ndownloader/files/22781999)
Supplement: Supplementary file 1 [file 22781999]

Table 1. Descriptive statistics and correlation matrix

| Variables                  |                               | Mean  | S.D. | Correlations |         |         |          |          |          |           |          |          |          |        |       |         |    |
|----------------------------|-------------------------------|-------|------|--------------|---------|---------|----------|----------|----------|-----------|----------|----------|----------|--------|-------|---------|----|
|                            |                               |       |      | 1            | 2       | 3       | 4        | 5        | 6        | 7         | 8        | 9        | 10       | 11     | 12    | 13      | 14 |
| 1                          | Knowledge sharing             | 0.00  | 0.97 | 1            |         |         |          |          |          |           |          |          |          |        |       |         |    |
| 2                          | Public official               | 0.67  | 0.46 | 0.10***      | 1       |         |          |          |          |           |          |          |          |        |       |         |    |
| 3                          | <i>Sexenio</i>                | 0.85  | 0.35 | 0.02         | 0.44*** | 1       |          |          |          |           |          |          |          |        |       |         |    |
| 4                          | Gender                        | 0.62  | 0.48 | -0.22        | 0.12*** | 0.01    | 1        |          |          |           |          |          |          |        |       |         |    |
| 5                          | Dedication                    | 0.95  | 0.20 | -0.00        | 0.30*** | 0.31*** | 0.05     | 1        |          |           |          |          |          |        |       |         |    |
| 6                          | Age                           | 30.31 | 9.54 | 0.12***      | 0.63*** | 0.29*** | 0.15***  | 0.10***  | 1        |           |          |          |          |        |       |         |    |
| 7                          | Arts-Humanities               | 0.12  | 0.32 | -0.09**      | 0.06    | -0.01   | -0.02    | 0.03     | 0.09**   | 1         |          |          |          |        |       |         |    |
| 8                          | Sciences                      | 0.41  | 0.49 | 0.13***      | 0.10*** | 0.07    | 0.04     | 0.06     | 0.08**   | -0.31***  | 1        |          |          |        |       |         |    |
| 9                          | Social-Legal Science          | 0.22  | 0.41 | -0.08**      | -0.05   | -0.02   | -0.13*** | -0.03    | -0.13*** | -0.20***  | -0.45*** | 1        |          |        |       |         |    |
| 10                         | Health Science                | 0.06  | 0.23 | 0.06         | -0.06   | 0.01    | -0.04    | -0.12*** | 0.061    | -0.09**   | -0.21*** | -0.13    | 1        |        |       |         |    |
| 11                         | Architecture-Engineering      | 0.16  | 0.37 | -0.05        | -0.06   | -0.04   | 0.16***  | 0.00     | -0.09**  | -0.016*** | -0.37*** | -0.24*** | -0.11*** | 1      |       |         |    |
| 12                         | Extrinsic motivation          | 0.00  | 1    | -0.02        | 0.00    | 0.03    | -0.05    | 0.04     | -0.10*** | -0.03     | -0.07    | 0.09**   | 0.02     | 0.014  | 1     |         |    |
| 13                         | Intrinsic motivation          | 0.00  | 1    | 0.14***      | 0.05    | 0.11*** | 0.02     | 0.05     | 0.01     | 0.05      | 0.04     | -0.03    | -0.00    | -0.063 | 0.000 | 1       |    |
| 14                         | Knowledge-oriented leadership | 0.00  | 0.97 | 0.70***      | 0.020   | 0.03    | -0.06    | -0.07    | -0.01    | -0.01     | -0.00    | 0.04     | 0.03     | -0.063 | 0.04  | 0.17*** | 1  |
| *** p < 0.010; ** p < 0.05 |                               |       |      |              |         |         |          |          |          |           |          |          |          |        |       |         |    |

**Table 2. The effect of motivation and leadership on knowledge sharing**

|                               | Model I  |        | Model II |        |
|-------------------------------|----------|--------|----------|--------|
|                               | $\beta$  | $t$    | $\beta$  | $t$    |
| (Constant)                    |          | −0.159 |          | −1.546 |
| Public official               | 0.136*   | 1.819  | 0.065    | 1.258  |
| Sexenio                       | −0.084   | −1.288 | −0.084*  | −1.857 |
| Gender                        | −0.076   | −1.353 | −0.040   | −1.043 |
| Dedication                    | −0.070   | −1.174 | 0.000    | −0.003 |
| Age                           | 0.031    | 0.444  | 0.040    | 0.823  |
| Arts-Humanities               | 0.036    | 0.579  | 0.061    | 1.436  |
| Sciences                      | 0.183*** | 2.651  | 0.195*** | 4.118  |
| Health Science                | 0.129**  | 2.205  | 0.097*** | 2.416  |
| Architecture-Engineering      | 0.051    | 0.762  | 0.070    | 1.526  |
| Extrinsic motivation          |          |        | −0.063*  | −1.615 |
| Intrinsic motivation          |          |        | 0.023    | 0.584  |
| Knowledge-oriented leadership |          |        | 0.714*** | 18.518 |
| $R^2$                         | 0.064    |        | 0.568    |        |
| $R^2$ Adjusted                | 0.036    |        | 0.551    |        |

|          |         |           |
|----------|---------|-----------|
| <i>F</i> | 2.335** | 33.463*** |
|----------|---------|-----------|

\*\*\* $p < 0.01$ ; \*\*  $p < 0.05$ ; \*  $p < 0.1$

**Table 3. Robustness analysis: the effect of motivation and leadership on scientific knowledge sharing**  
by scientific areas

|                               | Arts-Humanities |          | Sciences |          | Social-Legal Science |          | Architecture-Engineering |          |
|-------------------------------|-----------------|----------|----------|----------|----------------------|----------|--------------------------|----------|
|                               | Beta            | <i>t</i> | Beta     | <i>t</i> | Beta                 | <i>t</i> | Beta                     | <i>t</i> |
| (Constant)                    |                 | −0.379   |          | 1.183    |                      | −1.976   |                          | 0.832    |
| Public official               | 0.184           | 1.080    | 0.065    | 0.674    | −0.013               | 0.144    | 0.095                    | 0.831    |
| Sexenio                       | −0.182          | −1.215   | −0.051   | −0.602   | −0.149               | −1.607   | 0.045                    | 0.449    |
| Gender                        | 0.168           | 1.062    | −0.044   | −0.687   | −0.018               | −0.247   | −0.111                   | −1.212   |
| Dedication                    | 0.058           | 0.360    | −0.070   | −0.955   | 0.095                | 1.237    | −0.135                   | −1.383   |
| Age                           | −0.094          | −0.484   | −0.023   | −0.260   | 0.102                | 1.131    | 0.003                    | 0.025    |
| Extrinsic motivation          | 0.038           | 0.235    | 0.068    | 1.044    | −0.114               | −1.442   | −0.179*                  | −1.887   |
| Intrinsic motivation          | −0.017          | −0.120   | 0.101    | 1.560    | 0.020                | 0.259    | −0.024                   | −0.260   |
| Knowledge-oriented leadership | 0.795***        | 5.736    | 0.678*** | 10.362   | 0.770***             | 10.496   | 0.685***                 | 7.181    |
| $R^2$                         | 0.646           |          | 0.512    |          | 0.623                |          | 0.609                    |          |
| $R^2$ Adjusted                | 0.517           |          | 0.482    |          | 0.582                |          | 0.548                    |          |
| $F$                           | 5.02***         |          | 16.56*** |          | 15.076***            |          | 10.105***                |          |

\*\*\* $p < 0.01$ ; \*\*  $p < 0.05$ ; \*  $p < 0.1$

Health Science is not analysed because of small simple size.

APPENDIX I

Table A1. Confirmatory factor analysis for knowledge sharing

| Items                                                                                                       | Com. | Factor load | Cronbach's alpha |
|-------------------------------------------------------------------------------------------------------------|------|-------------|------------------|
| My research team members always share their knowledge and experience with the rest                          | 0.88 | 0.939       | 0.957            |
| My research team members always give their knowledge to others                                              | 0.86 | 0.931       |                  |
| My research team members always look for synergies in order to facilitate others' work                      | 0.74 | 0.863       |                  |
| My research team members always share with each other their research results (new articles, projects, etc.) | 0.74 | 0.860       |                  |
| Eigenvalue                                                                                                  |      | 43.424      |                  |
| Total % explained variance                                                                                  |      | 80.881      |                  |
| Kaiser–Meyer–Olkin                                                                                          |      | 0.863       |                  |
| Bartlett's test of sphericity                                                                               |      | 2555.261*** |                  |

**Table A2. Exploratory factor analysis for motivation**

| Items                                       | Com. | Factor load 1 | Factor load 2 | Cronbach's alpha |
|---------------------------------------------|------|---------------|---------------|------------------|
| I research for research merits              | 0.70 | <b>0.836</b>  | 0.031         | 0.733            |
| I research for financial rewards            | 0.57 | <b>0.752</b>  | −0.085        |                  |
| I research for promotion                    | 0.60 | <b>0.749</b>  | 0.199         |                  |
| I research for my own prestige              | 0.52 | <b>0.615</b>  | 0.383         |                  |
| I research for my own personal satisfaction | 0.73 | 0.093         | <b>0.851</b>  | 0.645            |
| Research is part of my activity             | 0.66 | 0.053         | <b>0.834</b>  |                  |
| Eigenvalue                                  |      | 2.473         | 1.357         |                  |
| Total % explained variance                  |      |               | 81.350        |                  |
| Kaiser–Meyer–Olkin                          |      |               | 0.683         |                  |
| Bartlett's test of sphericity               |      |               | 895.77***     |                  |

**Table A3. Confirmatory factor analysis for knowledge-oriented leadership**

| Items                                                                                                                                                                                                         | Com. | Factor load | Cronbach's alpha |
|---------------------------------------------------------------------------------------------------------------------------------------------------------------------------------------------------------------|------|-------------|------------------|
| The leader of the research team promotes learning from the experience, tolerating mistakes up to a certain point                                                                                              | 0.79 | 0.928       | 0.945            |
| The leader of the research team is accustomed to assuming the role of knowledge leader, which is mainly characterized by openness, tolerance to mistakes and mediation for the achievement of team objectives | 0.86 | 0.890       |                  |
| The leader of the research team fosters an environment for the responsible behaviour of the research team members                                                                                             | 0.79 | 0.889       |                  |
| The leader of the research team rewards members who share and apply their knowledge                                                                                                                           | 0.66 | 0.881       |                  |
| The leader of the research team promotes the acquisition of external knowledge                                                                                                                                | 0.78 | 0.810       |                  |
| Eigenvalue                                                                                                                                                                                                    |      | 4.10        |                  |
| Total % explained variance                                                                                                                                                                                    |      | 77.537      |                  |
| Kaiser–Meyer–Olkin                                                                                                                                                                                            |      | 0.899       |                  |
| Bartlett's test of sphericity                                                                                                                                                                                 |      | 1919.176*** |                  |
